# Supplementary material
Source: PubMed Central journal article supplement (PMC5404546)
Supplement: AAC.02216-16_zac005176168s1.pdf [file AAC.02216-16_zac005176168s1.pdf]

**Supplementary Table 1. Baseline patient characteristics among patients treated with continuous DAP, continuous LZD, or sequential LZD-DAP treatment for VREF-BSI**

| Characteristic (N=2,630)                                  | DAP<br>(n=1,055) | LZD<br>(n=1,348) | LZD to DAP<br>(n=227) | P-<br>value |
|-----------------------------------------------------------|------------------|------------------|-----------------------|-------------|
| Age ≥ 65 years, n (%)                                     | 480 (45.5)       | 737 (54.7)       | 103 (45.4)            | <0.001      |
| Male gender, n (%)                                        | 1027 (97.3)      | 1319 (97.8)      | 218 (96.0)            | 0.251       |
| Concomitant pneumonia <sup>a</sup> , n (%)                | 34 (3.2)         | 65 (4.8)         | 21 (9.3)              | <0.001      |
| Facility complexity level, n (%)                          | ---              | ---              | ---                   | ---         |
| 1a (most complex)                                         | 784 (74.3)       | 787 (58.4)       | 148 (85.2)            | <0.001      |
| 1b                                                        | 178 (16.9)       | 348 (25.8)       | 54 (23.8)             | <0.001      |
| 1c                                                        | 80 (7.6)         | 164 (12.2)       | 22 (9.7)              | 0.001       |
| 2                                                         | 12 (1.1)         | 37 (2.7)         | 2 (0.9)               | 0.009       |
| 3 (least complex)                                         | 1 (0.1)          | 12 (0.9)         | 1 (0.4)               | 0.029       |
| Year of infection, n (%)                                  | ---              | ---              | ---                   | ---         |
| 2004                                                      | 10 (0.9)         | 180 (13.4)       | 7 (3.1)               | <0.001      |
| 2005                                                      | 35 (3.3)         | 219 (16.2)       | 17 (7.5)              | <0.001      |
| 2006                                                      | 64 (6.1)         | 222 (16.5)       | 24 (10.9)             | <0.001      |
| 2007                                                      | 85 (8.1)         | 179 (13.3)       | 26 (11.5)             | <0.001      |
| 2008                                                      | 132 (12.5)       | 173 (12.8)       | 37 (16.3)             | 0.295       |
| 2009                                                      | 125 (11.8)       | 107 (7.9)        | 31 (13.7)             | 0.001       |
| 2010                                                      | 146 (13.8)       | 65 (4.8)         | 29 (12.8)             | <0.001      |
| 2011                                                      | 154 (14.6)       | 78 (5.8)         | 20 (8.8)              | <0.001      |
| 2012                                                      | 128 (12.1)       | 59 (4.4)         | 20 (8.8)              | <0.001      |
| 2013                                                      | 97 (9.2)         | 42 (3.1)         | 8 (3.5)               | <0.001      |
| 2014                                                      | 79 (7.5)         | 24 (1.8)         | 8 (3.5)               | <0.001      |
| Infectious diseases consult <sup>b</sup> , n (%)          | 571 (54.1)       | 548 (40.7)       | 121 (53.3)            | <0.001      |
| Source of VRE-BSI, n (%)                                  | ---              | ---              | ---                   | ---         |
| Genitourinary only                                        | 134 (12.7)       | 174 (12.9)       | 29 (12.8)             | 0.989       |
| Abdominal/gastrointestinal only                           | 52 (4.9)         | 52 (3.7)         | 7 (3.1)               | 0.419       |
| Line-associated only                                      | 96 (9.1)         | 177 (13.1)       | 21 (9.3)              | 0.005       |
| Endocarditis/cardiac device only                          | 99 (9.4)         | 97 (7.2)         | 25 (11.0)             | 0.053       |
| Wound/Bone only                                           | 26 (2.5)         | 31 (2.3)         | 8 (3.5)               | 0.477       |
| Multiple                                                  | 158 (15.0)       | 175 (13.0)       | 54 (23.8)             | <0.001      |
| Unknown                                                   | 490 (46.4)       | 642 (47.6)       | 83 (36.5)             | 0.006       |
| Previous VRE stool colonization <sup>c</sup> , n (%)      | 122 (11.6)       | 128 (9.5)        | 18 (7.9)              | 0.125       |
| Time-to- treatment (days) <sup>d</sup> , median (IQR)     | 3 (2-4)          | 3 (2-4)          | 3 (1-3)               | <0.001      |
| Concomitant β-lactam treatment <sup>e</sup> , n (%)       | 812 (77.0)       | 1086 (80.6)      | 203 (89.4)            | <0.001      |
| Concomitant aminoglycoside treatment <sup>f</sup> , n (%) | 120 (11.4)       | 155 (11.5)       | 39 (17.2)             | 0.039       |
| Intensive care unit admission, n (%)                      | 317 (30.0)       | 455 (33.8)       | 78 (34.4)             | 0.123       |
| Any malignancy, n (%)                                     | 421 (39.9)       | 399 (29.6)       | 73 (32.2)             | <0.001      |
| Solid tumor                                               | 262 (24.9)       | 259 (19.2)       | 42 (18.5)             | 0.002       |
| Hematologic                                               | 286 (27.1)       | 207 (15.4)       | 42 (18.5)             | <0.001      |
| Solid organ transplant recipient, n (%)                   | 39 (3.7)         | 33 (2.4)         | 13 (5.7)              | 0.019       |
| Kidney                                                    | 9 (0.9)          | 10 (0.7)         | 5 (2.2)               | 0.098       |
| Liver                                                     | 28 (2.7)         | 22 (1.6)         | 8 (3.5)               | 0.088       |
| Lung                                                      | 2 (0.2)          | 0 (0.0)          | 1 (0.4)               | 0.123       |
| Heart                                                     | 2 (0.2)          | 2 (0.1)          | 0 (0.0)               | 0.801       |
| Charlson comorbidity index, median (IQR)                  | 7 (4-9)          | 7 (4-9)          | 7 (4-10)              | 0.176       |
| Moderate-severe renal disease                             | 569 (53.9)       | 686 (50.9)       | 122 (53.7)            | 0.303       |
| Severe liver disease, n (%)                               | 130 (12.3)       | 97 (7.2)         | 37 (16.3)             | <0.001      |
| Metastatic solid tumor, n (%)                             | 128 (12.1)       | 167 (12.4)       | 18 (7.9)              | 0.151       |
| HIV-positive, n (%)                                       | 29 (2.7)         | 39 (2.9)         | 7 (3.1)               | 0.909       |
| Neutropenia, n (%)                                        | 186 (17.6)       | 82 (6.8)         | 24 (10.6)             | <0.001      |
| Thrombocytopenia, n (%)                                   | 222 (21.0)       | 122 (9.1)        | 31 (13.7)             | <0.001      |
| APACHE II, median (IQR)                                   | 14 (10-17)       | 14 (10-18)       | 15 (12-19)            | 0.013       |

VRE-BSI, vancomycin-resistant *Enterococcus faecium* bloodstream infection; LZD, linezolid (continuous); DAP, daptomycin (continuous); LZD-DAP, sequential linezolid to daptomycin therapy; HIV, human immunodeficiency virus; APACHE II, Acute Physiology and Chronic Health Evaluation II

Categorical variables compared by chi-square or Fisher's exact test

Continuous variables compared by Mann-Whitney *U* test

<sup>a</sup> Within 72 hours of index culture

<sup>b</sup> Within 48 hours of treatment

<sup>c</sup> Positive VRE stool screening within preceding 90 days; negative culture data not available

<sup>d</sup> Time from index VRE blood culture to first dose of daptomycin or linezolid

<sup>e</sup> At least 1 dose of the following: ampicillin, ampicillin/sulbactam, ticarcillin/clavulanate, aztreonam, cefazolin, cefotaxime, ceftazidime, ceftriaxone, cefepime, ertapenem, meropenem, doripenem, imipenem/cilastatin, or piperacillin/tazobactam

<sup>f</sup> At least 1 dose of the following: amikacin, gentamicin, or tobramycin
